# Supplementary material for: Association of 25-Hydroxyvitamin D with Preterm Birth and Premature Rupture of Membranes: A Mendelian Randomization Study
Source: MDPI journal article supplement (doi:10.3390/nu15163593), 2023-08-16
Supplement: s1 [file s1]

# Association of 25-hydroxyvitamin D with preterm birth and premature rupture of membranes: a Mendelian randomization study

Haoyue Cheng <sup>1,2</sup>, Peihan Chi <sup>1,2</sup>, Yan Zhuang <sup>1,2</sup>, Xialidan Alifu <sup>1,2</sup>, Haibo Zhou <sup>1,2</sup>, Yiwen Qiu <sup>1,2</sup>, Ye Huang <sup>1,2</sup>, Libi Zhang <sup>1,2</sup>, Diliyaer Ainiwan <sup>1,2</sup>, Zhicheng Peng <sup>1,2</sup>, Shuting Si <sup>3</sup>, Hui Liu <sup>4</sup> and Yunxian Yu <sup>1,2,\*</sup>

<sup>1</sup> Department of Public Health and Department of Anesthesiology, the Second Affiliated Hospital of Zhejiang University School of Medicine, Hangzhou 310009, China.

<sup>2</sup> Department of Epidemiology & Health Statistics, School of Public Health, School of Medicine, Zhejiang University, Hangzhou 310058, China.

<sup>3</sup> Yiwu Maternity and Children Hospital, Yiwu 322000, China.

<sup>4</sup> Sir Run Run Shaw Hospital, School of Medicine, Zhejiang University, Hangzhou 310000, China.

\* Correspondence: yunxianyu@zju.edu.cn

Table S1. Association of 25(OH)D concentrations in three trimesters with PTB

| Variables               | Model 1*          |          | Model 2 <sup>†</sup> |          |
|-------------------------|-------------------|----------|----------------------|----------|
|                         | OR (95% CI)       | <i>p</i> | OR (95% CI)          | <i>p</i> |
| <b>First trimester</b>  |                   |          |                      |          |
| 25(OH)D, ng/mL          | 1.02 (0.94, 1.10) | 0.662    | 1.01 (0.93, 1.10)    | 0.792    |
| Vitamin D deficiency    |                   |          |                      |          |
| No                      | ref.              | -        | ref.                 | -        |
| Yes                     | 1.00 (0.75, 1.32) | 0.977    | 1.02 (0.77, 1.37)    | 0.875    |
| <b>Second trimester</b> |                   |          |                      |          |
| 25(OH)D, ng/mL          | 1.03 (0.93, 1.14) | 0.546    | 1.06 (0.96, 1.18)    | 0.250    |
| Vitamin D deficiency    |                   |          |                      |          |
| No                      | ref.              | -        | ref.                 | -        |
| Yes                     | 0.90 (0.55, 1.48) | 0.681    | 0.85 (0.51, 1.43)    | 0.539    |
| <b>Third trimester</b>  |                   |          |                      |          |
| 25(OH)D, ng/mL          | 0.90 (0.79, 1.02) | 0.110    | 0.95 (0.82, 1.10)    | 0.465    |
| Vitamin D deficiency    |                   |          |                      |          |
| No                      | ref.              | -        | ref.                 | -        |
| Yes                     | 1.90 (1.03, 3.49) | 0.040    | 1.54 (0.79, 2.99)    | 0.206    |

\* Model 1: Crude model

<sup>†</sup> Model 2: Adjusted for maternal age, pre-pregnancy BMI, educational level, parity, PTB history, gestational week at blood sampling and sampling season

Table S2. Association of 25(OH)D concentrations in three trimesters with spontaneous PTB

| Variables               | Model 1*          |          | Model 2†          |          |
|-------------------------|-------------------|----------|-------------------|----------|
|                         | OR (95% CI)       | <i>p</i> | OR (95% CI)       | <i>p</i> |
| <b>First trimester</b>  |                   |          |                   |          |
| 25(OH)D, ng/mL          | 0.95 (0.84, 1.08) | 0.460    | 0.94 (0.82, 1.07) | 0.350    |
| Vitamin D deficiency    |                   |          |                   |          |
| No                      | ref.              | -        | ref.              | -        |
| Yes                     | 1.17 (0.77, 1.79) | 0.465    | 1.24 (0.80, 1.91) | 0.344    |
| <b>Second trimester</b> |                   |          |                   |          |
| 25(OH)D, ng/mL          | 1.00 (0.85, 1.18) | 0.987    | 0.99 (0.83, 1.18) | 0.910    |
| Vitamin D deficiency    |                   |          |                   |          |
| No                      | ref.              | -        | ref.              | -        |
| Yes                     | 0.94 (0.42, 2.11) | 0.878    | 0.97 (0.42, 2.24) | 0.938    |
| <b>Third trimester</b>  |                   |          |                   |          |
| 25(OH)D, ng/mL          | 0.86 (0.71, 1.04) | 0.111    | 0.91 (0.74, 1.12) | 0.358    |
| Vitamin D deficiency    |                   |          |                   |          |
| No                      | ref.              | -        | ref.              | -        |
| Yes                     | 3.20 (1.40, 7.32) | 0.006    | 2.69 (1.08, 6.68) | 0.034    |

\* Model 1: Crude model

† Model 2: Adjusted for maternal age, pre-pregnancy BMI, educational level, parity, PTB history, gestational week at blood sampling and sampling season

Table S3. Association of 25(OH)D concentrations in three trimesters with spontaneous PTB from MR analysis

| Variables            | n (%)      | Model 1*          |          | Model 2†          |          |
|----------------------|------------|-------------------|----------|-------------------|----------|
|                      |            | OR (95% CI)       | <i>p</i> | OR (95% CI)       | <i>p</i> |
| First trimester      |            |                   |          |                   |          |
| 25(OH)D, ng/mL       | 103 (4.94) | 1.00 (0.94, 1.06) | 0.976    | 1.00 (0.95, 1.06) | 0.995    |
| Vitamin D deficiency |            |                   |          |                   |          |
| No                   | 33 (4.47)  | ref.              | -        | ref.              | -        |
| Yes                  | 70 (5.20)  | 1.00 (0.78, 1.30) | 0.976    | 1.00 (0.79, 1.27) | 0.995    |
| Second trimester     |            |                   |          |                   |          |
| 25(OH)D, ng/mL       | 33 (3.00)  | 1.02 (0.98, 1.06) | 0.295    | 1.03 (0.98, 1.08) | 0.270    |
| Vitamin D deficiency |            |                   |          |                   |          |
| No                   | 25 (3.05)  | ref.              | -        | ref.              | -        |
| Yes                  | 8 (2.87)   | 0.88 (0.70, 1.12) | 0.301    | 0.86 (0.64, 1.14) | 0.280    |
| Third trimester      |            |                   |          |                   |          |
| 25(OH)D, ng/mL       | 23 (1.86)  | 1.00 (0.98, 1.03) | 0.896    | 1.00 (0.98, 1.03) | 0.947    |
| Vitamin D deficiency |            |                   |          |                   |          |
| No                   | 11 (1.20)  | ref.              | -        | ref.              | -        |
| Yes                  | 12 (3.75)  | 0.99 (0.82, 1.19) | 0.896    | 0.99 (0.83, 1.19) | 0.947    |

\*Model 1: Crude model

† Model 2: Adjusted for maternal age, pre-pregnancy BMI, educational level, parity, PTB history, gestational week at blood sampling and sampling season

Table S4. Association of 25(OH)D concentrations in three trimesters with PROM

| Variables               | Model 1*          |          | Model 2 <sup>†</sup> |          |
|-------------------------|-------------------|----------|----------------------|----------|
|                         | OR (95% CI)       | <i>p</i> | OR (95% CI)          | <i>p</i> |
| <b>First trimester</b>  |                   |          |                      |          |
| 25(OH)D, ng/mL          | 1.05 (0.99, 1.11) | 0.082    | 1.05 (0.99, 1.12)    | 0.100    |
| Vitamin D deficiency    |                   |          |                      |          |
| No                      | ref.              | -        | ref.                 | -        |
| Yes                     | 0.82 (0.67, 1.00) | 0.055    | 0.83 (0.67, 1.01)    | 0.068    |
| <b>Second trimester</b> |                   |          |                      |          |
| 25(OH)D, ng/mL          | 1.00 (0.95, 1.07) | 0.878    | 1.01 (0.95, 1.08)    | 0.768    |
| Vitamin D deficiency    |                   |          |                      |          |
| No                      | ref.              | -        | ref.                 | -        |
| Yes                     | 1.07 (0.81, 1.42) | 0.637    | 1.05 (0.78, 1.42)    | 0.725    |
| <b>Third trimester</b>  |                   |          |                      |          |
| 25(OH)D, ng/mL          | 1.08 (1.03, 1.14) | 0.003    | 1.06 (1.00, 1.12)    | 0.061    |
| Vitamin D deficiency    |                   |          |                      |          |
| No                      | ref.              | -        | ref.                 | -        |
| Yes                     | 0.69 (0.50, 0.94) | 0.020    | 0.78 (0.55, 1.09)    | 0.144    |

\* Model 1: Crude model

<sup>†</sup> Model 2: Adjusted for maternal age, pre-pregnancy BMI, educational level, parity, gestational age, gestational week at blood sampling and sampling season

Table S5. Association of 25(OH)D concentrations in three trimesters with PPROM

| Variables               | Model 1*          |          | Model 2†          |          |
|-------------------------|-------------------|----------|-------------------|----------|
|                         | OR (95% CI)       | <i>p</i> | OR (95% CI)       | <i>p</i> |
| <b>First trimester</b>  |                   |          |                   |          |
| 25(OH)D, ng/mL          | 1.11 (0.95, 1.30) | 0.173    | 1.10 (0.94, 1.30) | 0.233    |
| Vitamin D deficiency    |                   |          |                   |          |
| No                      | ref.              | -        | ref.              | -        |
| Yes                     | 0.82 (0.46, 1.45) | 0.498    | 0.87 (0.48, 1.57) | 0.642    |
| <b>Second trimester</b> |                   |          |                   |          |
| 25(OH)D, ng/mL          | 1.03 (0.85, 1.24) | 0.796    | 1.05 (0.86, 1.29) | 0.609    |
| Vitamin D deficiency    |                   |          |                   |          |
| No                      | ref.              | -        | ref.              | -        |
| Yes                     | 0.78 (0.29, 2.10) | 0.618    | 0.71 (0.26, 1.98) | 0.515    |
| <b>Third trimester</b>  |                   |          |                   |          |
| 25(OH)D, ng/mL          | 0.97 (0.75, 1.24) | 0.797    | 0.99 (0.75, 1.30) | 0.947    |
| Vitamin D deficiency    |                   |          |                   |          |
| No                      | ref.              | -        | ref.              | -        |
| Yes                     | 1.01 (0.27, 3.83) | 0.987    | 0.86 (0.21, 3.61) | 0.836    |

\* Model 1: Crude model

† Model 2: Adjusted for maternal age, pre-pregnancy BMI, educational level, parity, PTB history, gestational week at blood sampling and sampling season

Table S6. Association of single SNP with PTB

| Variables  | Model 1*          |          | Model 2†          |          |
|------------|-------------------|----------|-------------------|----------|
|            | OR (95% CI)       | <i>p</i> | OR (95% CI)       | <i>p</i> |
| rs1155563  |                   |          |                   |          |
| TT         | ref.              | -        | ref.              | -        |
| TC         | 0.95 (0.71, 1.27) | 0.732    | 0.94 (0.70, 1.26) | 0.677    |
| CC         | 0.94 (0.65, 1.38) | 0.762    | 0.93 (0.63, 1.35) | 0.693    |
| rs16846876 |                   |          |                   |          |
| AA         | ref.              | -        | ref.              | -        |
| AT         | 0.97 (0.74, 1.27) | 0.808    | 0.96 (0.73, 1.26) | 0.746    |
| TT         | 0.73 (0.44, 1.19) | 0.207    | 0.71 (0.43, 1.17) | 0.182    |
| rs2298849  |                   |          |                   |          |
| AA         | ref.              | -        | ref.              | -        |
| AG         | 1.04 (0.78, 1.37) | 0.810    | 1.05 (0.79, 1.39) | 0.734    |
| GG         | 1.15 (0.76, 1.72) | 0.513    | 1.17 (0.78, 1.76) | 0.453    |
| rs7041     |                   |          |                   |          |
| AA         | ref.              | -        | ref.              | -        |
| AC         | 0.85 (0.64, 1.13) | 0.264    | 0.85 (0.64, 1.13) | 0.273    |
| CC         | 1.39 (0.87, 2.22) | 0.173    | 1.44 (0.89, 2.30) | 0.135    |
| rs4588     |                   |          |                   |          |
| GG         | ref.              | -        | ref.              | -        |
| GT         | 1.10 (0.84, 1.44) | 0.490    | 1.08 (0.82, 1.41) | 0.596    |
| TT         | 0.54 (0.31, 0.93) | 0.027    | 0.52 (0.30, 0.90) | 0.020    |
| rs2209314  |                   |          |                   |          |
| TT         | ref.              | -        | ref.              | -        |
| CT         | 1.00 (0.75, 1.34) | 0.992    | 0.99 (0.74, 1.33) | 0.951    |
| CC         | 1.18 (0.81, 1.72) | 0.397    | 1.16 (0.79, 1.69) | 0.456    |

\* Model 1: Crude model

† Model 2: Adjusted for maternal age, pre-pregnancy BMI, educational level, parity and PTB history

Table S7. Association of single SNP with spontaneous PTB

| Variables  | Model 1*          |          | Model 2†          |          |
|------------|-------------------|----------|-------------------|----------|
|            | OR (95% CI)       | <i>p</i> | OR (95% CI)       | <i>p</i> |
| rs1155563  |                   |          |                   |          |
| TT         | ref.              | -        | ref.              | -        |
| TC         | 0.86 (0.55, 1.34) | 0.505    | 0.88 (0.56, 1.36) | 0.559    |
| CC         | 1.10 (0.64, 1.90) | 0.732    | 1.11 (0.64, 1.92) | 0.712    |
| rs16846876 |                   |          |                   |          |
| AA         | ref.              | -        | ref.              | -        |
| AT         | 1.03 (0.68, 1.55) | 0.898    | 1.03 (0.68, 1.55) | 0.891    |
| TT         | 0.77 (0.36, 1.64) | 0.494    | 0.76 (0.35, 1.63) | 0.474    |
| rs2298849  |                   |          |                   |          |
| AA         | ref.              | -        | ref.              | -        |
| AG         | 1.05 (0.68, 1.61) | 0.825    | 1.05 (0.68, 1.62) | 0.814    |
| GG         | 1.22 (0.67, 2.20) | 0.516    | 1.17 (0.65, 2.13) | 0.597    |
| rs7041     |                   |          |                   |          |
| AA         | ref.              | -        | ref.              | -        |
| AC         | 0.84 (0.55, 1.28) | 0.411    | 0.84 (0.55, 1.28) | 0.422    |
| CC         | 1.17 (0.55, 2.51) | 0.680    | 1.24 (0.58, 2.67) | 0.582    |
| rs4588     |                   |          |                   |          |
| GG         | ref.              | -        | ref.              | -        |
| GT         | 0.93 (0.62, 1.40) | 0.740    | 0.93 (0.62, 1.40) | 0.722    |
| TT         | 0.58 (0.26, 1.28) | 0.177    | 0.57 (0.26, 1.28) | 0.175    |
| rs2209314  |                   |          |                   |          |
| TT         | ref.              | -        | ref.              | -        |
| CT         | 0.84 (0.54, 1.30) | 0.425    | 0.80 (0.51, 1.25) | 0.324    |
| CC         | 1.22 (0.70, 2.10) | 0.482    | 1.19 (0.69, 2.06) | 0.530    |

\* Model 1: Crude model

† Model 2: Adjusted for maternal age, pre-pregnancy BMI, educational level, parity and PTB history



Table S8. Association of single SNP with PROM

| Variables  | Model 1*          |          | Model 2†          |          |
|------------|-------------------|----------|-------------------|----------|
|            | OR (95% CI)       | <i>p</i> | OR (95% CI)       | <i>p</i> |
| rs1155563  |                   |          |                   |          |
| TT         | ref.              | -        | ref.              | -        |
| TC         | 0.94 (0.77, 1.16) | 0.584    | 0.95 (0.77, 1.17) | 0.623    |
| CC         | 0.88 (0.67, 1.16) | 0.361    | 0.87 (0.67, 1.15) | 0.331    |
| rs16846876 |                   |          |                   |          |
| AA         | ref.              | -        | ref.              | -        |
| AT         | 0.85 (0.70, 1.03) | 0.100    | 0.85 (0.70, 1.03) | 0.100    |
| TT         | 0.90 (0.65, 1.23) | 0.500    | 0.90 (0.65, 1.24) | 0.508    |
| rs2298849  |                   |          |                   |          |
| AA         | ref.              | -        | ref.              | -        |
| AG         | 0.90 (0.74, 1.10) | 0.326    | 0.91 (0.75, 1.12) | 0.382    |
| GG         | 1.18 (0.89, 1.56) | 0.257    | 1.18 (0.89, 1.57) | 0.244    |
| rs7041     |                   |          |                   |          |
| AA         | ref.              | -        | ref.              | -        |
| AC         | 1.13 (0.93, 1.37) | 0.212    | 1.13 (0.93, 1.37) | 0.216    |
| CC         | 1.25 (0.87, 1.80) | 0.226    | 1.24 (0.86, 1.79) | 0.251    |
| rs4588     |                   |          |                   |          |
| GG         | ref.              | -        | ref.              | -        |
| GT         | 0.87 (0.71, 1.05) | 0.150    | 0.86 (0.70, 1.05) | 0.131    |
| TT         | 0.89 (0.65, 1.21) | 0.461    | 0.90 (0.66, 1.23) | 0.520    |
| rs2209314  |                   |          |                   |          |
| TT         | ref.              | -        | ref.              | -        |
| CT         | 1.13 (0.92, 1.39) | 0.248    | 1.15 (0.93, 1.41) | 0.202    |
| CC         | 1.17 (0.89, 1.54) | 0.270    | 1.15 (0.88, 1.52) | 0.309    |

\* Model 1: Crude model

† Model 2: Adjusted for maternal age, pre-pregnancy BMI, educational level, parity and gestational age

Table S9. Association of single SNP with PPRM

| Variables  | Model 1*          |          | Model 2†          |          |
|------------|-------------------|----------|-------------------|----------|
|            | OR (95% CI)       | <i>p</i> | OR (95% CI)       | <i>p</i> |
| rs1155563  |                   |          |                   |          |
| TT         | ref.              | -        | ref.              | -        |
| TC         | 0.86 (0.47, 1.56) | 0.612    | 0.84 (0.46, 1.54) | 0.582    |
| CC         | 0.85 (0.39, 1.88) | 0.688    | 0.84 (0.38, 1.86) | 0.667    |
| rs16846876 |                   |          |                   |          |
| AA         | ref.              | -        | ref.              | -        |
| AT         | 0.77 (0.43, 1.37) | 0.373    | 0.76 (0.43, 1.36) | 0.353    |
| TT         | 0.64 (0.22, 1.84) | 0.408    | 0.63 (0.22, 1.81) | 0.389    |
| rs2298849  |                   |          |                   |          |
| AA         | ref.              | -        | ref.              | -        |
| AG         | 0.90 (0.50, 1.61) | 0.712    | 0.91 (0.50, 1.64) | 0.751    |
| GG         | 1.03 (0.44, 2.41) | 0.951    | 1.05 (0.45, 2.46) | 0.915    |
| rs7041     |                   |          |                   |          |
| AA         | ref.              | -        | ref.              | -        |
| AC         | 0.65 (0.34, 1.24) | 0.195    | 0.65 (0.34, 1.24) | 0.196    |
| CC         | 2.60 (1.22, 5.55) | 0.014    | 2.68 (1.25, 5.74) | 0.011    |
| rs4588     |                   |          |                   |          |
| GG         | ref.              | -        | ref.              | -        |
| GT         | 0.70 (0.39, 1.26) | 0.233    | 0.69 (0.38, 1.24) | 0.210    |
| TT         | 0.71 (0.27, 1.86) | 0.491    | 0.70 (0.27, 1.82) | 0.458    |
| rs2209314  |                   |          |                   |          |
| TT         | ref.              | -        | ref.              | -        |
| CT         | 1.25 (0.67, 2.33) | 0.478    | 1.24 (0.67, 2.32) | 0.494    |
| CC         | 1.24 (0.54, 2.82) | 0.608    | 1.23 (0.54, 2.80) | 0.625    |

\* Model 1: Crude model

† Model 2: Adjusted for maternal age, pre-pregnancy BMI, educational level, parity and PTB history
